# Supplementary material
Source: publisher figshare collection journal article supplement (https://acs.figshare.com/ndownloader/files/4051057)
Supplement: Supplementary file 1 [file 4051057]

**Supporting Information for**

**Gold Nanoparticles as a Vaccine Platform:  
Influence of Size and Shape on Immunological  
Responses *In Vitro* and *In Vivo***

Kenichi Niiikura, Tatsuya Matsunaga, Tadaki Suzuki, Shintaro Kobayashi, Hiroki Yamaguchi, Yasuko Orba,  
Akira Kawaguchi, Hideki Hasegawa, Kiichi Kajino, Takafumi Ninomiya, Kuniharu Ijima, and Hirofumi  
Sawa

## UV-vis spectra of AuNPs

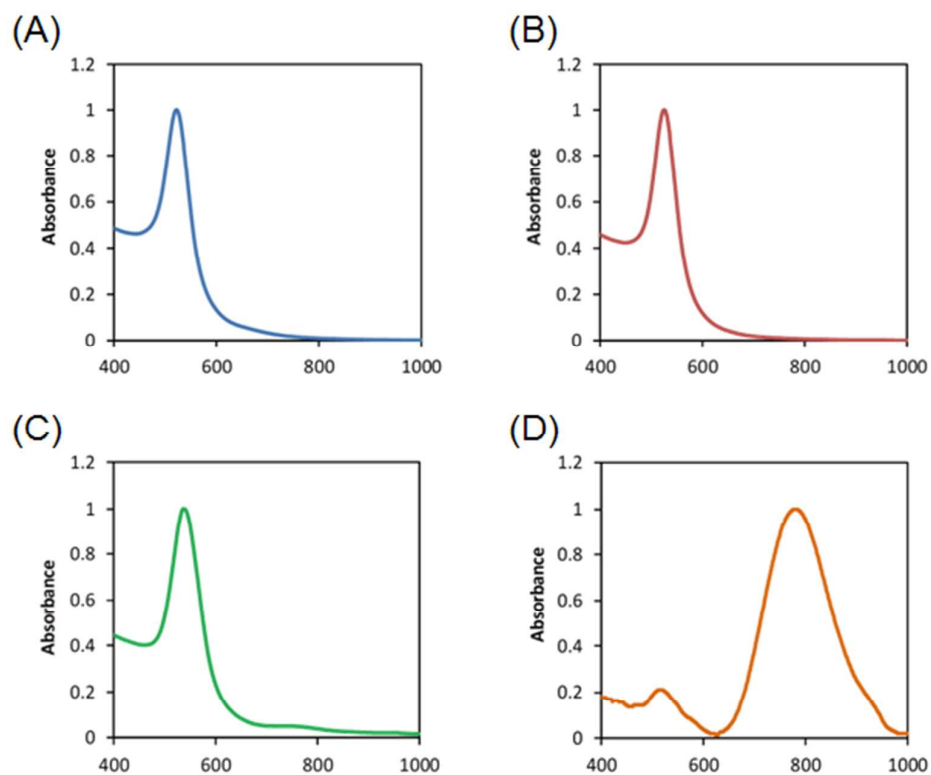

**Figure S1.** Absorption spectra of (A) Sphere20, (B) Sphere40, (C) Cube, and (D) Rod

### Protein modification of AuNPs

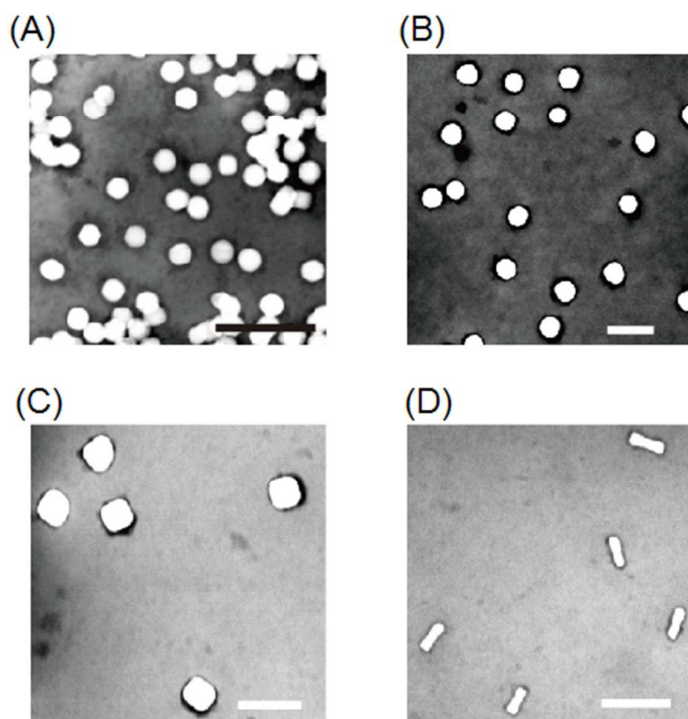

**Figure S2.** Dark-field TEM images of (A) Sphere20-E, (B) Sphere40-E, (C) Cube-E, and (D) Rod-E NPs. The samples were observed after negative staining with 2% phosphotungstic acid. Scale bar represents 100 nm.

### Cytotoxicity of AuNP-Es to RAW264.7 cells

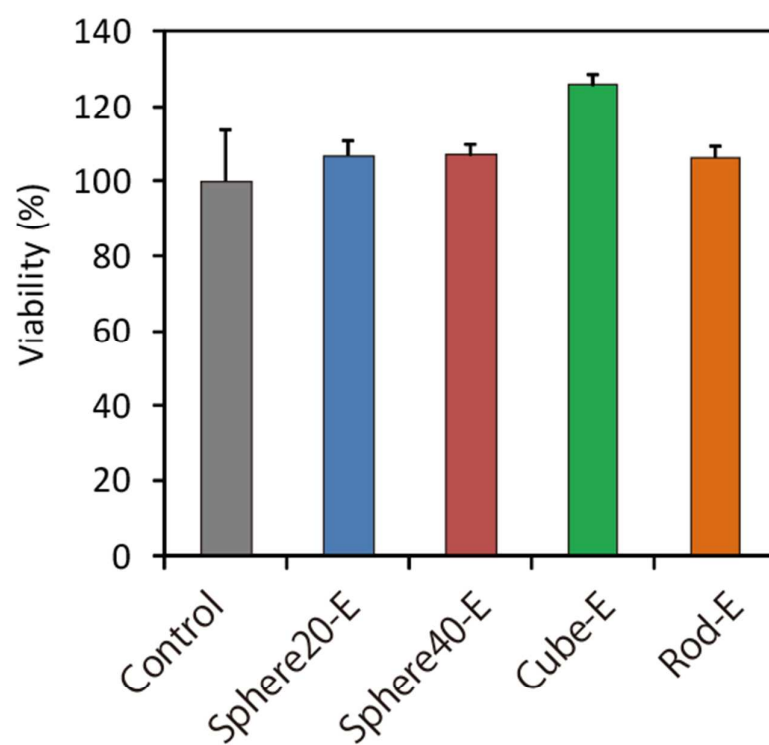

**Figure S3.** Cytotoxicity of AuNP-E to RAW264.7 macrophage cells treated with  $5 \times 10^{10}$  NPs/mL AuNP-Es for 1.5 hr.

**Fluorescence microscopy of RAW264.7 cells treated with AuNP-Es**

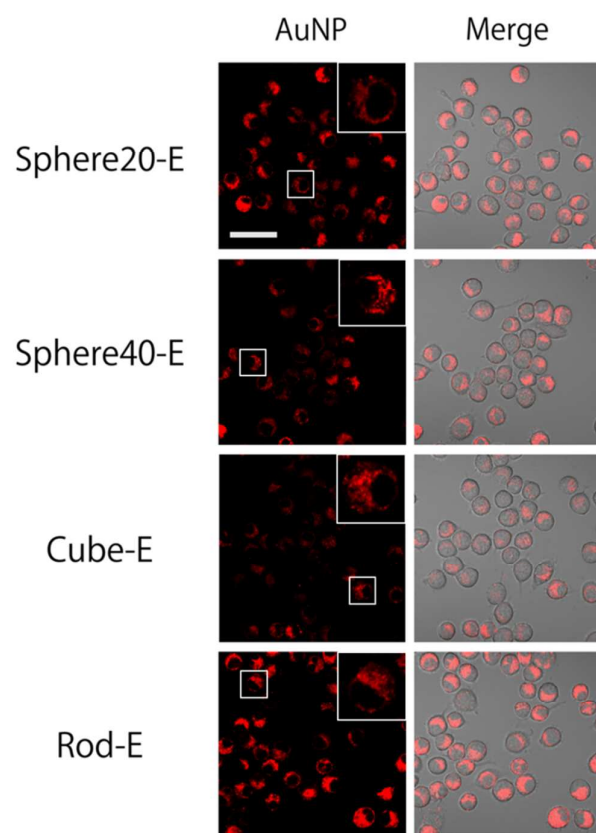

**Figure S4.** CLMS images of RAW264.7 macrophage cells treated with  $5 \times 10^{10}$  NPs/mL AuNP-Es conjugated with Alexa Fluor 647 for 1.5 hr. Scale bar represents 40  $\mu\text{m}$ .

**Effect of protein coating on cellular uptake by RAW264.7 cells**

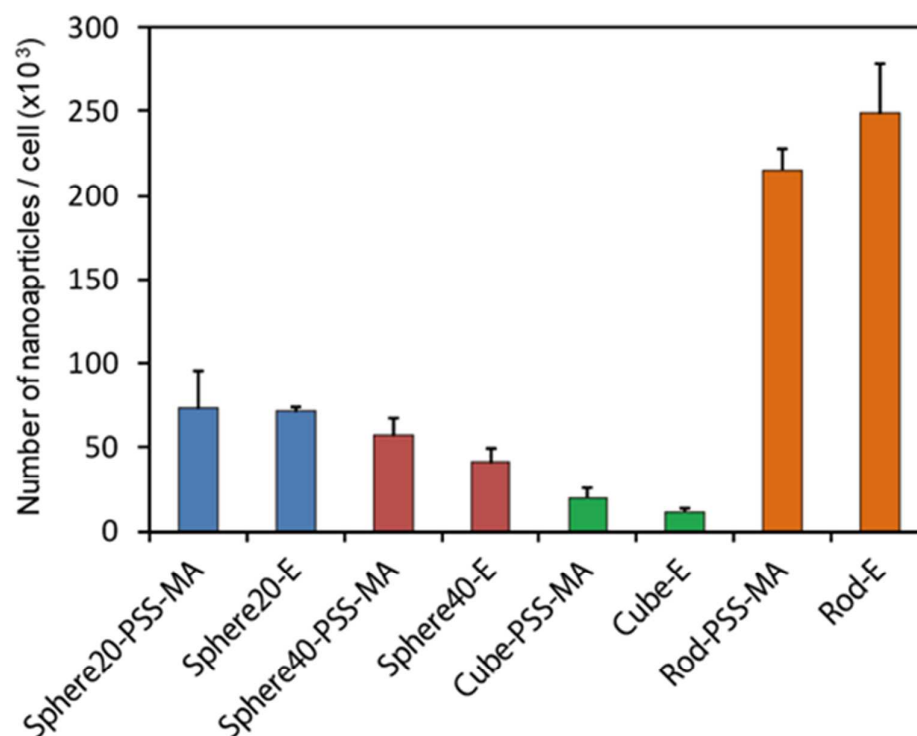

**Figure S5.** Uptake of AuNPs by RAW264.7 cells treated with  $5 \times 10^{10}$  NPs/mL AuNPs coated with or without WNVE protein (AuNP-E and AuNP-PSS-MA, respectively) for 1.5 hr (means  $\pm$  SEM, n = 3).

### Colocalization and lysosomal escape of AuNP-Es

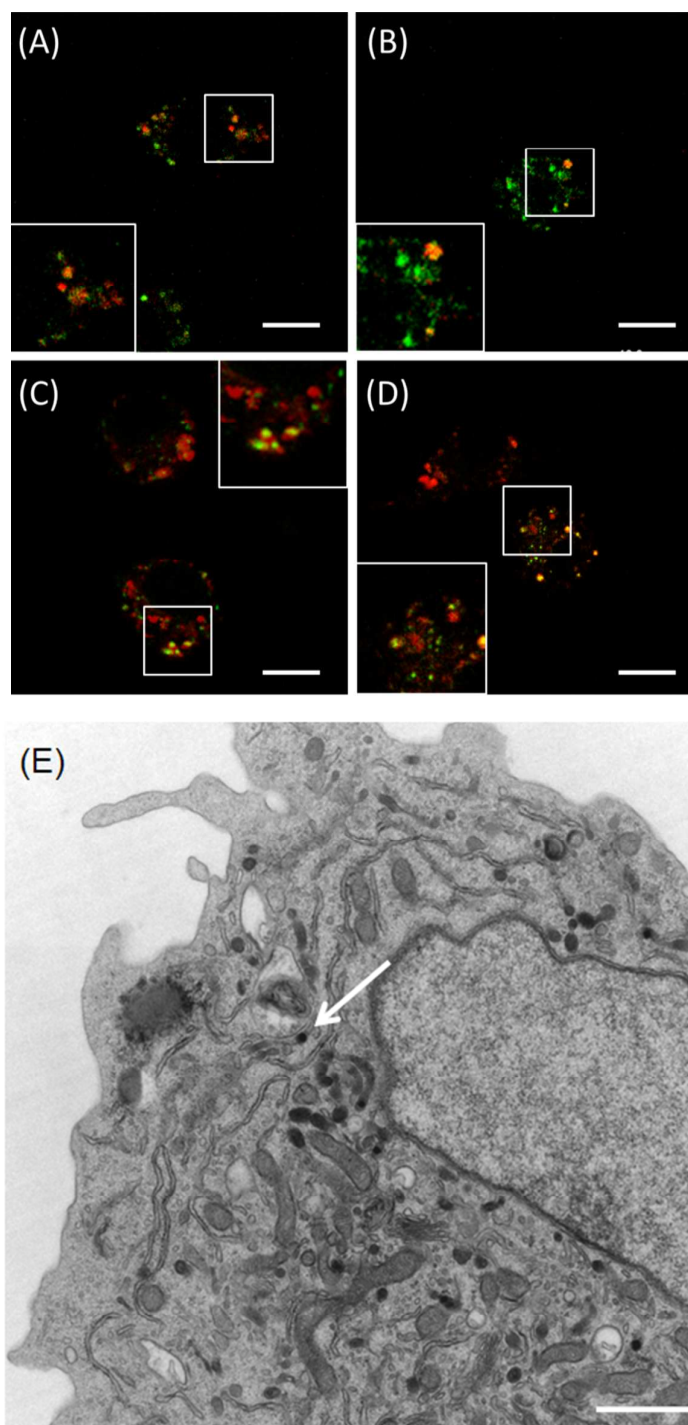

**Figure S6.** CLMS images of RAW264.7 macrophage cells treated with 2  $\mu\text{g/mL}$  (A) Sphere20-E, (B) Sphere40-E, (C) Cube-E, and (D) Rod-E NPs conjugated with Alexa Fluor 647 for 2 hr (red). After AuNP-E treatment, lysosomes were stained with 50 nM LysoTracker Blue DND-22 for 30 min (green). Scale bar represents 10  $\mu\text{m}$ . TEM images of whole cells treated with (E) Cube-Es. The white arrow indicates a nanoparticle distributed in the cytosol. Scale bar represents 1  $\mu\text{m}$ .



**Fluorescence microscopy of BMDCs treated with AuNP-Es**

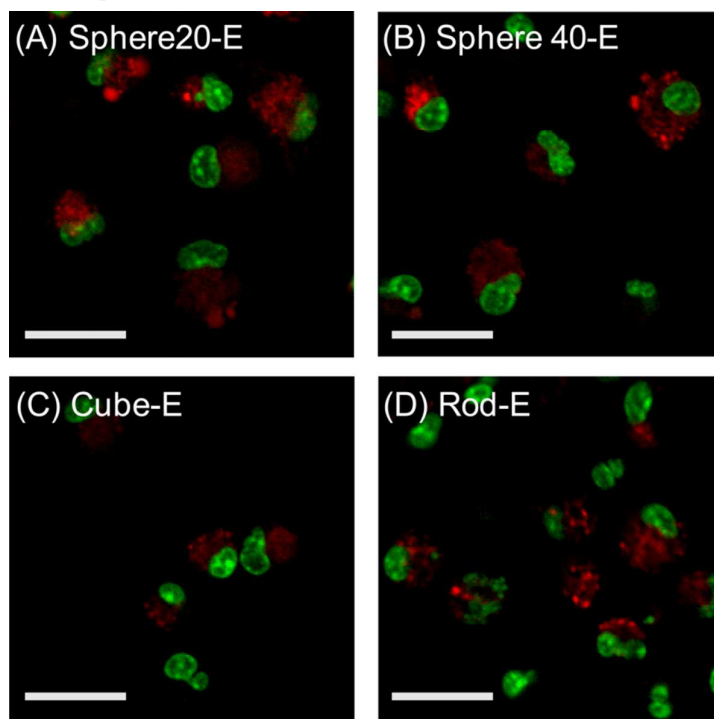

**Figure S7** CLMS images of BMDCs treated with 10  $\mu\text{g/mL}$  (A) Sphere20-E, (B) Sphere40-E, (C) Cube-E, and (D) Rod-E NPs conjugated with Alexa Fluor 647 for 24 hr. Scale bar represents 20  $\mu\text{m}$ .

**Cellular uptake of AuNP-Es by BMDCs determined by ICP-AES.**

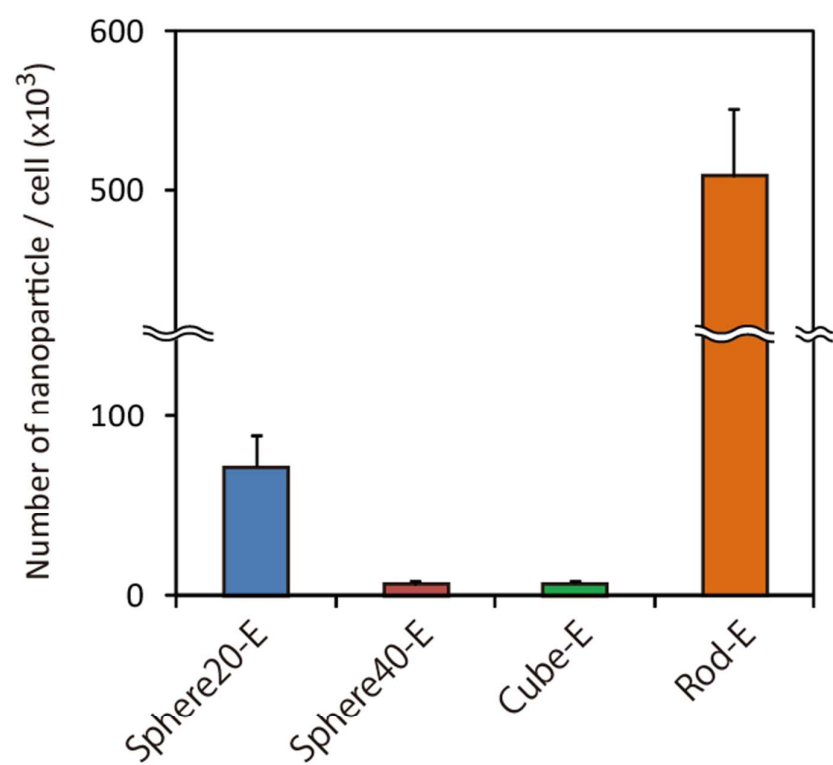

**Figure S8.** Uptake of AuNP-Es by BMDCs treated with 10  $\mu\text{g/mL}$  AuNP-Es for 24 hr (means  $\pm$  SEM,  $n = 3$ ).

**Table S1.** Physicochemical parameters of AuNP-E

|            | $\zeta$ -potential (mV) | Surface area (nm <sup>2</sup> ) | Number of protein /particle | Specific surface area (nm <sup>-1</sup> ) |
|------------|-------------------------|---------------------------------|-----------------------------|-------------------------------------------|
| Sphere20-E | -24 $\pm$ 3             | 1100                            | 9.7 $\pm$ 3                 | 0.32                                      |
| Sphere40-E | -23 $\pm$ 1             | 5800                            | 74 $\pm$ 4                  | 0.14                                      |
| Cube-E     | -11 $\pm$ 0.5           | 10100                           | 52 $\pm$ 6                  | 0.15                                      |
| Rod-E      | -9.9 $\pm$ 0.3          | 1300                            | 46 $\pm$ 2                  | 0.46                                      |
